# Supplementary material
Source: PubMed Central journal article supplement (PMC4369453)
Supplement: NIHMS658569-supplement-1.pdf [file NIHMS658569-supplement-1.pdf]

Supplementary fig.1

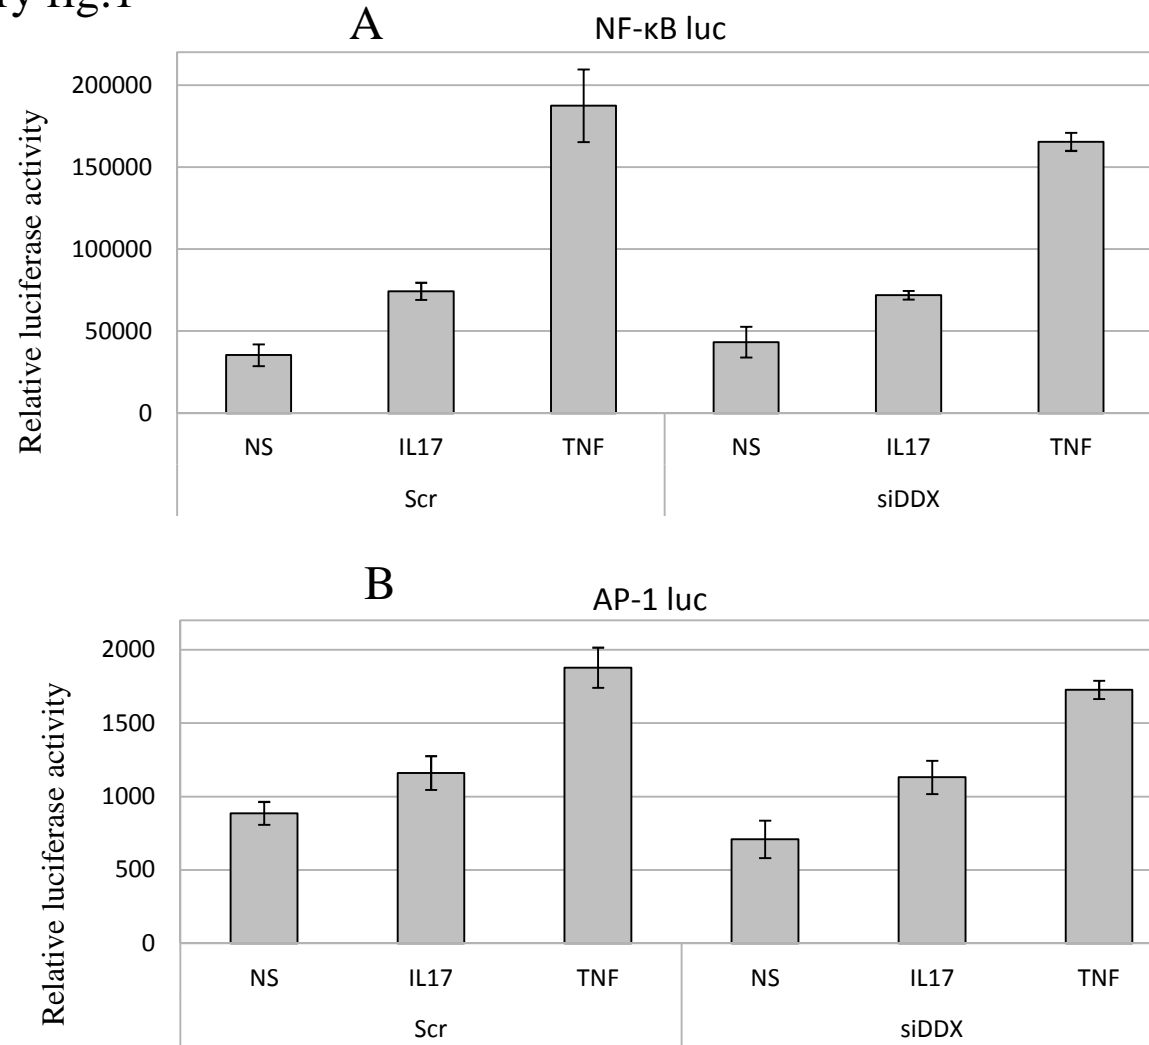

**Fig. S1. NF-κB (A) and AP-1 (B) –dependent reporter activity in parental and DDX3X interfered cells.** Control (scr), and DDX3X-interfered (siDDX) MEFs were transfected with a -κB reporter (A) or an AP-1 reporter (B) and stimulated with IL-17 or TNF for 4 hours.

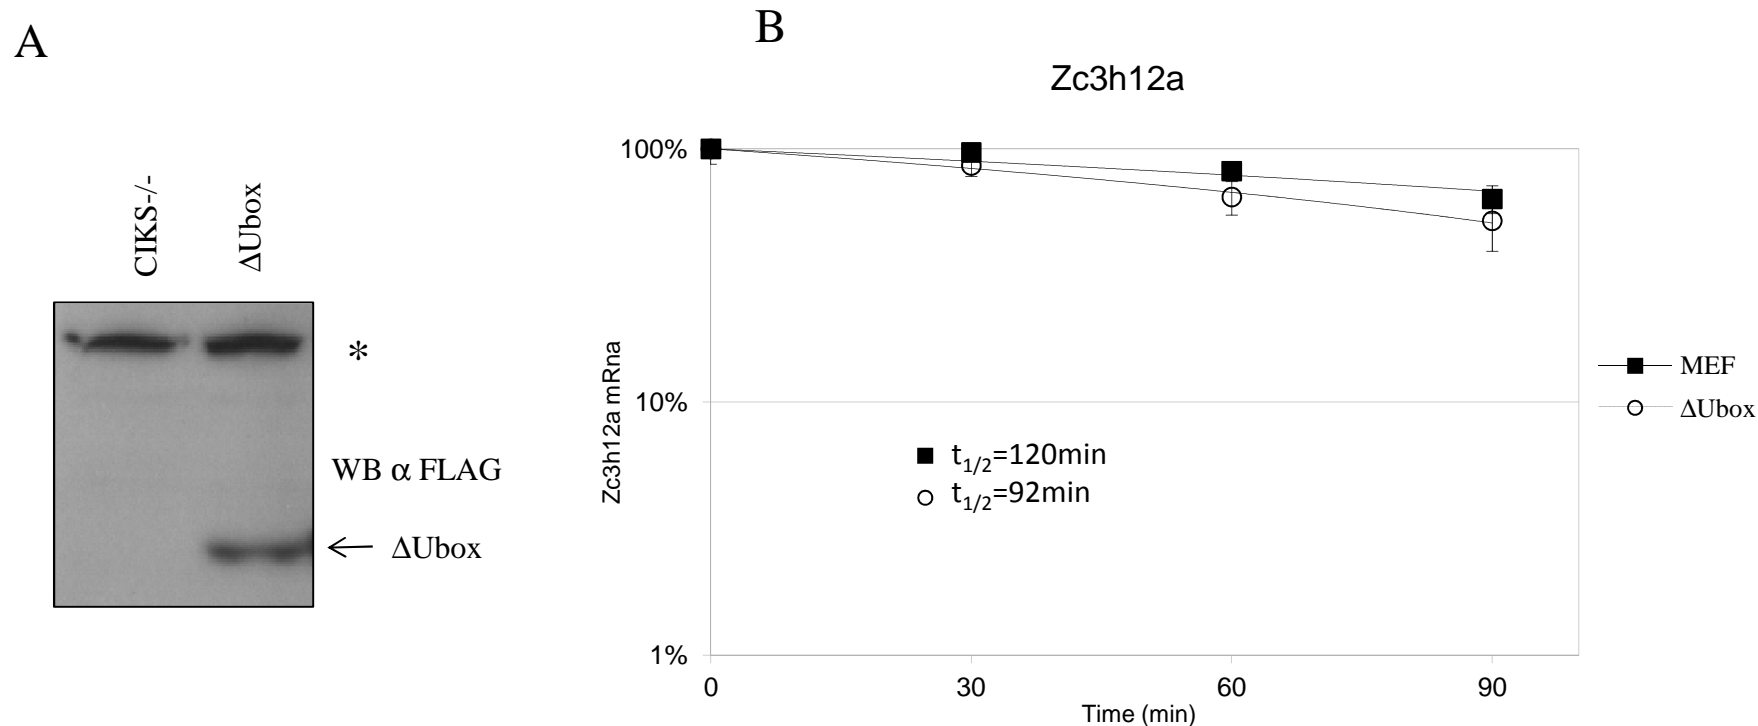

**Fig. S2. The Ubox domain of CIKS is dispensable for *zc3h12a* stabilization.**

**A)** Expression of CIKS  $\Delta$ Ubox protein in CIKS<sup>-/-</sup> and reconstituted with  $\Delta$ Ubox MEFs.

\* Indicates non-specific cross-reactive bands.

**B)** *Zc3h12a* mRNA level in control (MEF) and  $\Delta$ Ubox reconstituted MEFs ( $\Delta$ Ubox), after treatment with TNF- $\alpha$  (60 minutes) followed by combined addition of IL-17 and actinomycin D.
